# Supplementary material for: Stable magnesium peroxide at high pressure
Source: PubMed Central journal article supplement (PMC4555032; doi:10.1038/srep13582), 2015-09-01
Supplement: srep13582-s1.pdf [file srep13582-s1.pdf]

## SUPPLEMENTARY INFORMATION

### Stable magnesium peroxide at high pressure

Sergey S. Lobanov<sup>1,2,\*</sup>, Qiang Zhu<sup>3</sup>, Nicholas Holtgrewe<sup>1,4</sup>, Clemens Prescher<sup>5</sup>, Vitali B. Prakapenka<sup>5</sup>, Artem Oganov<sup>3,6,7</sup>, Alexander F. Goncharov<sup>1,8,9</sup>

<sup>1</sup>Geophysical Laboratory, Carnegie Institution of Washington, Washington, DC 20015, USA

<sup>2</sup>V.S. Sobolev Institute of Geology and Mineralogy SB RAS, Novosibirsk 630090, Russia

<sup>3</sup>Department of Geosciences, Department of Physics and Astronomy, Stony Brook University, Stony Brook, NY 11794, USA

<sup>4</sup>Howard University, 2400 Sixth Street NW, Washington, DC 20059, USA

<sup>5</sup>Center for Advanced Radiation Sources, University of Chicago, Chicago, IL 60632, USA

<sup>6</sup>Moscow Institute of Physics and Technology, 9 Institutskiy lane, Dolgoprudny city, Moscow Region, 141700, Russian Federation

<sup>7</sup>School of Materials Science, Northwestern Polytechnical University, Xi'an, 710072, China

<sup>8</sup>Key Laboratory of Materials Physics, Institute of Solid State Physics, CAS, Hefei, 230031, China

<sup>9</sup>University of Science and Technology of China, Hefei, 230026, China

[\\*slobanov@carnegiescience.edu](mailto:slobanov@carnegiescience.edu)

## Supplementary Tables

Supplementary Table S1. Lattice parameters of *I4/mcm* MgO<sub>2</sub>

| Run # | P, GPa            |                   |                   | a, Å    | $\sigma$ (a, Å) | c, Å   | $\sigma$ (c, Å) | V, (Å <sup>3</sup> ) | $\sigma$ (V, Å <sup>3</sup> ) |
|-------|-------------------|-------------------|-------------------|---------|-----------------|--------|-----------------|----------------------|-------------------------------|
|       | MgO               |                   | Au                |         |                 |        |                 |                      |                               |
|       | Ref. <sup>1</sup> | Ref. <sup>2</sup> | Ref. <sup>3</sup> |         |                 |        |                 |                      |                               |
| A1    | 93.5              | <b>95.6</b>       | -                 | 3.9994  | 0.0009          | 4.7458 | 0.0032          | 75.9104              | 0.0482                        |
| A1    | 94.0              | <b>96</b>         | -                 | 3.9988  | 0.0010          | 4.7343 | 0.0031          | 75.7028              | 0.0417                        |
| A1    | 95.5              | <b>97.6</b>       | -                 | 3.9973  | 0.0014          | 4.7271 | 0.0034          | 75.5300              | 0.0501                        |
| A1    | 95.7              | <b>97.8</b>       | -                 | 3.9961  | 0.0008          | 4.7243 | 0.0038          | 75.4409              | 0.0501                        |
| A1    | 97                | <b>99.2</b>       | -                 | 3.99161 | 0.0008          | 4.7181 | 0.0031          | 75.1726              | 0.0469                        |
| A2    | 101.5             | <b>104</b>        | -                 | 3.9787  | 0.0001          | 4.7188 | 0.0004          | 74.6971              | 0.0058                        |
| A2    | 102.5             | <b>105</b>        | -                 | 3.9803  | 0.0001          | 4.7115 | 0.0004          | 74.6421              | 0.0058                        |
| B2    | 130.0             | <b>134.3</b>      | -                 | 3.9211  | 0.0007          | 4.6040 | 0.0027          | 70.7882              | 0.0375                        |
| B2    | 131.5             | <b>135.9</b>      | -                 | 3.92225 | 0.0008          | 4.6026 | 0.0027          | 70.8061              | 0.0376                        |
| B2    | 139.0             | <b>144</b>        | 149,9             | 3.8985  | 0.0007          | 4.5605 | 0.0027          | 69.3124              | 0.0363                        |
| B2    | 154.0             | <b>159.9</b>      | 161.1             | 3.8666  | 0.0013          | 4.5646 | 0.0038          | 68.2455              | 0.0559                        |
| B2*   | 152.0             | <b>158</b>        | 156.8             | 3.8862  | 0.0009          | 4.5502 | 0.0028          | 68.7188              | 0.0362                        |
| B2*   | 150.0             | <b>155.8</b>      | 152.9             | 3.8909  | 0.0014          | 4.5849 | 0.0033          | 69.4122              | 0.0458                        |
| B2*   | 146.5             | <b>152.1</b>      | 151.6             | 3.9060  | 0.0008          | 4.5529 | 0.0035          | 69.4645              | 0.0535                        |
| B2*   | 116.5             | <b>119.9</b>      | 116.5             | 3.9451  | 0.0010          | 4.6359 | 0.0030          | 72.1509              | 0.0450                        |
| B2*   | 115.0             | <b>118.3</b>      | -                 | 3.9666  | 0.0009          | 4.6063 | 0.0028          | 72.4751              | 0.0385                        |
| B2*   | 114.5             | <b>117.8</b>      | 109               | 3.9619  | 0.0010          | 4.6631 | 0.0031          | 73.1970              | 0.0459                        |
| B2*   | 112.0             | <b>115.1</b>      | 111.5             | 3.9617  | 0.0013          | 4.6617 | 0.0039          | 73.1655              | 0.0612                        |
| B2*   | 110.0             | <b>113</b>        | -                 | 3.9800  | 0.0010          | 4.6614 | 0.0031          | 73.8394              | 0.0463                        |
| B2*   | 108.0             | <b>110.9</b>      | -                 | 3.9718  | 0.0013          | 4.6822 | 0.0040          | 73.8614              | 0.0620                        |
| B2*   | 103.0             | <b>105.6</b>      | 104.8             | 3.9831  | 0.0014          | 4.7070 | 0.0040          | 74.6762              | 0.0630                        |
| B2*   | 83.5              | <b>85</b>         | -                 | 4.0478  | 0.0012          | 4.8181 | 0.0034          | 78.9424              | 0.0520                        |
| B2*   | 83.0              | <b>84.4</b>       | -                 | 4.0299  | 0.0014          | 4.8199 | 0.0042          | 78.2748              | 0.0676                        |
| B2*   | 82.5              | <b>83.9</b>       | -                 | 4.0517  | 0.0012          | 4.8096 | 0.0034          | 78.9547              | 0.0519                        |
| B2*   | 74.0              | <b>75</b>         | 74.2              | 4.0784  | 0.0019          | 4.8687 | 0.0040          | 80.9809              | 0.0585                        |

Pressure was gauged using MgO EOS by Speziale et al. <sup>1</sup>, Tange et al. <sup>2</sup>, and Au EOS is after Fei et al. <sup>3</sup>. Pressure values used to construct *I4/mcm* MgO<sub>2</sub> EOS are shown in bold. Decompression run is marked with an asterisk.

**Supplementary Table S2.** Computed lattice parameters of *I4/mcm* MgO<sub>2</sub>

| P, GPa | a, Å   | c, Å   |
|--------|--------|--------|
| 70     | 4.0853 | 4.8762 |
| 80     | 4.0572 | 4.8277 |
| 90     | 4.0315 | 4.7836 |
| 100    | 4.0076 | 4.7409 |
| 110    | 3.9855 | 4.7021 |
| 120    | 3.9649 | 4.6662 |
| 130    | 3.9455 | 4.6325 |
| 140    | 3.9272 | 4.6004 |
| 150    | 3.9101 | 4.5697 |

**Supplementary Table S3.** Experimentally and theoretically (DFT) derived parameters of the 300 K third-order Birch-Murnaghan EOS of *I4/mcm* MgO<sub>2</sub>

|                          | V <sub>0</sub> , Å <sup>3</sup> | K <sub>0</sub> , GPa | K <sub>0</sub> ' |
|--------------------------|---------------------------------|----------------------|------------------|
| Compression              | 105.4                           | 151.6                | 4                |
| Decompression            | 110.1                           | 127.1                | 4                |
| DFT                      | 106.8                           | 147                  | 4.1              |
| MgO (Ref. <sup>1</sup> ) | 74.71                           | 160.2                | 3.99             |
| MgO (Ref. <sup>2</sup> ) | 74.698                          | 160.64               | 4.221            |

## Supplementary Figures

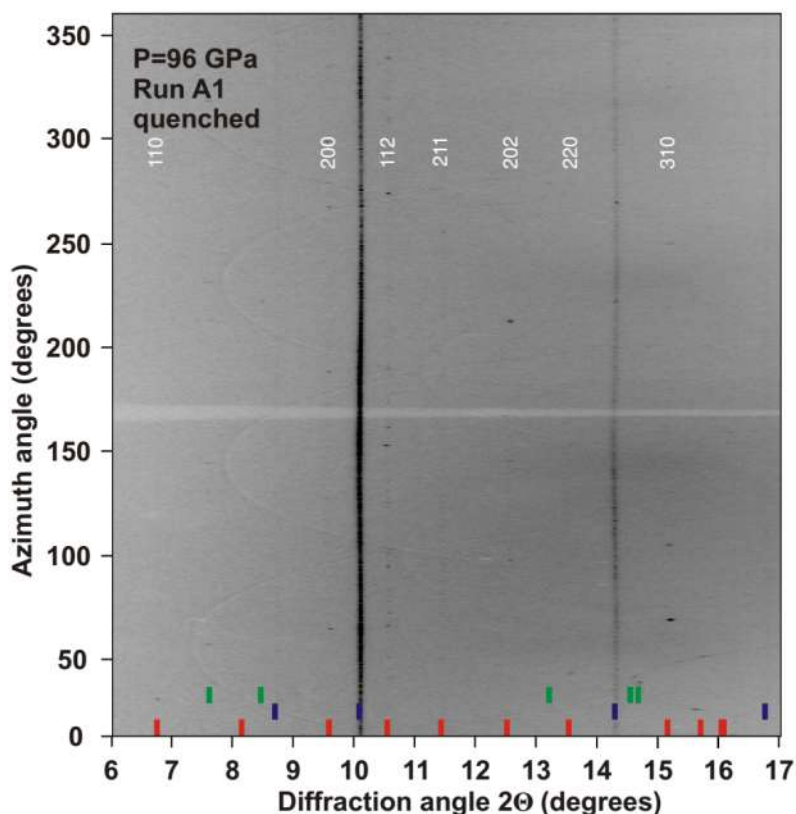

**Supplementary Figure S1.** XRD image (cake) of  $I4/mcm$   $MgO_2$  synthesized at 96 GPa from the mixture of  $MgO$  and  $O_2$ . Red and violet ticks correspond to the positions of  $I4/mcm$   $MgO_2$  and  $MgO$ , respectively. Green ticks represent spotty reflections of  $\zeta$ - $O_2$ . White labels are Miller indices of the indexed tetragonal phase. A slight curvature of the vertical lines (originating from  $MgO$  is due to a pressure gradient in the sample cavity). The x-ray wavelength is  $0.3344 \text{ \AA}$ .

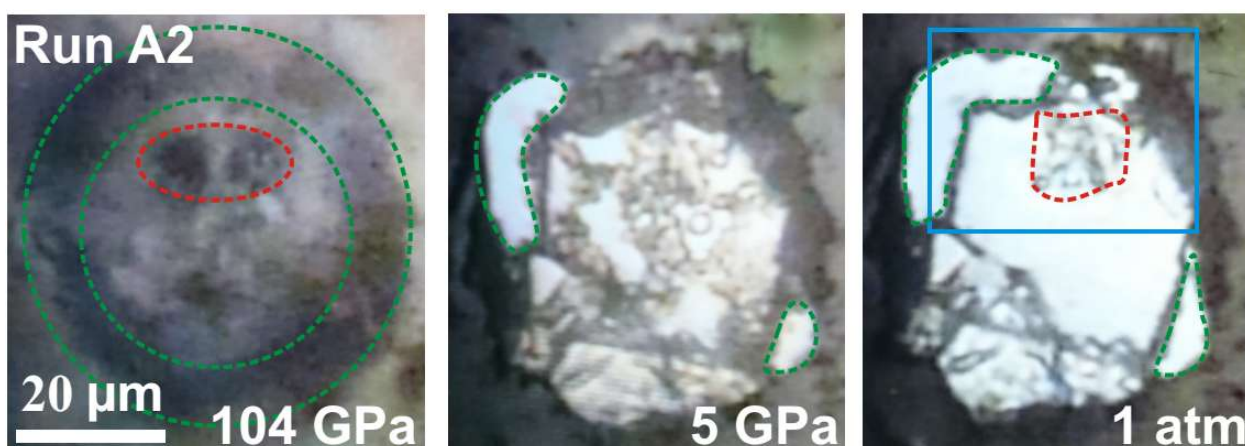

**Supplementary Figure S2.** Optical images of the A2 sample in a DAC cavity. Laser-heated area (red dashed line) is shielded from Re gasket by oxygen (green dashed lines). Note the transition from the metallic  $\zeta$ - $O_2$  at

104 GPa (opaque) to transparent at 5 GPa. At 1 atm oxygen was no longer trapped in the DAC. Blue solid line corresponds to the sample area shown in the [Figure 5](#).

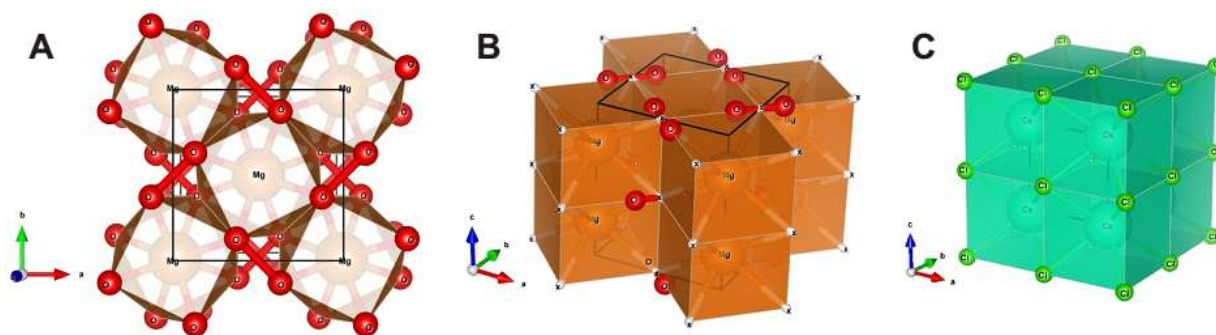

**Supplementary Figure S3.** The crystal structure of  $I4/mcm$   $MgO_2$  (panels **A** and **B**) as compared to  $CsCl$ -type (**C**). Lattice positions marked with an  $x$  in panel **B** are centers of the  $O-O$  dumbbells. Black solid lines represent unit cells. Crystal structures were visualized by S.S.L. using VESTA v.3 (Ref.<sup>4</sup>).

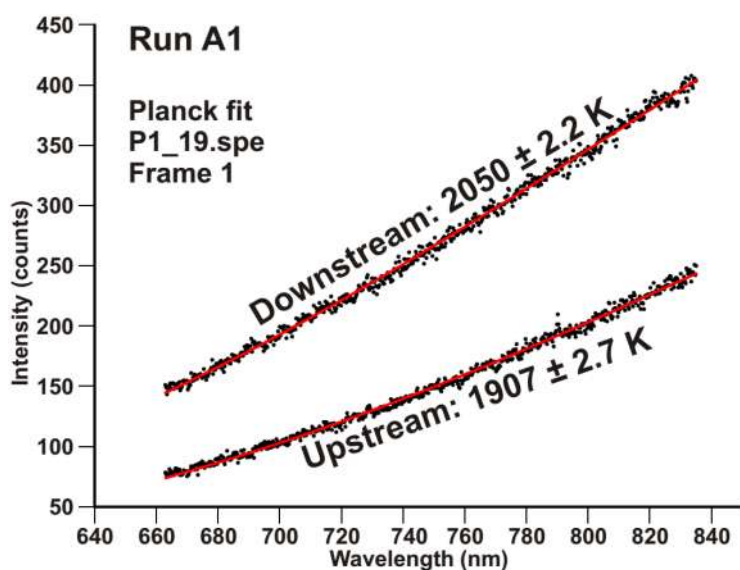

**Supplementary Figure S4.** Planck fits (red curves) to the collected thermal radiation (black dots). Only statistical uncertainty related to the fit quality is shown.

### Supplementary References

1. Speziale, S., Zha, C. S., Duffy, T. S., Hemley, R. J., Mao, H. K. Quasi-hydrostatic compression of magnesium oxide to 52 GPa: Implications for the pressure-volume-temperature equation of state. *Journal of Geophysical Research*, **106**, 515-528 (2001).

2. Tange, Y., Nishihara, Y., Tsuchiya, T. Unified analyses for P-V-T equation of state of MgO: A solution for pressure-scale problems in high P-T experiments. *J Geophys Res-Sol Ea*, **114**, (2009).
3. Fei, Y. W., et al. Toward an internally consistent pressure scale. *Proc. Natl. Acad. Sci. U.S.A.*, **104**, 9182-9186 (2007).
4. Momma, K. & Izumi, F. VESTA 3 for three-dimensional visualization of crystal, volumetric and morphology data. *J. Appl. Crystallogr.*, **44**, 1272-1276 (2011).
